# Supplementary material for: Assessment of renal function before contrast media injection: right decisions based on inaccurate estimates
Source: Springer Nature journal article supplement (doi:10.1007/s00330-018-5753-z), 2018-11-09
Supplement: MOESM1 [file 16261958]

**Table ESM 1:** Accuracy of creatinine clearance and of six prediction equations to predict numerical values of GFR obtained by reference method (EDTA). Each entry (correlation coefficient r, mean absolute error of prediction MAE, mean relative error of prediction MRE) represents the mean value and 95 % confidence intervals of the mean in the three groups: all patients (n = 50), the patients with GFR below 30 ml/min/1.73 m2 (n = 29), and GFR equal or above 30 ml/min/1.73 m2 (n = 21).

| test | GFR all data (n = 50) | | | GFR < 30 ml/min (n = 29) | | | GFR ≥ 30 ml/min (n = 21) | | |
| --- | --- | --- | --- | --- | --- | --- | --- | --- | --- |
| r | MAE  [ml/min] | MRE [%] | r | MAE  [ml/min] | MRE [%] | r | MAE  [ml/min] | MRE [%] |
| CC | 0.93  (0.88 - 0.96) | 7.7  (5.5 - 9.9) | 28  (20 - 36) | 0.68  (0.42 - 0.84) | 4.1  (2.9 - 5.3) | 27  (15 - 38) | 0.87  (0.70 - 0.95) | 10.9  (6.4 - 15.4) | 20  (10 - 29) |
| CG | 0.87  (0.78 - 0.92) | 10.4  (6.7 - 14.1) | 33  (24 - 43) | 0.70  (0.45 - 0.85) | 4.0  (2.9 - 5.1) | 27  (16 - 39) | 0.73  (0.43 - 0.88) | 17.9  (9.6 - 26.2) | 31  (17 - 44) |
| MDRD | 0.84  (0.73 - 0.90) | 11.1  (7.3 - 14.9) | 33  (24 - 42) | 0.78  (0.57 - 0.89) | 3.6  (2.7 - 4.5) | 25  (14 - 35) | 0.64  (0.29 - 0.84) | 20.1  (12.8 - 27.3) | 36  (22 - 49) |
| CKD-EPI | 0.88  (0.79 - 0.93) | 9.8  (6.8 - 12.9) | 31  (22 - 39) | 0.78  (0.57 - 0.89) | 3.6  (2.6 - 4.5) | 24  (14 - 35) | 0.73  (0.43 - 0.88) | 16.9  (11.1 - 22.6) | 31  (18 - 33) |
| LM | 0.86  (0.77 - 0.92) | 10.5  (7.4 - 13.6) | 32  (24 - 40) | 0.76  (0.55 - 0.88) | 3.7  (2.8 - 4.7) | 25  (15 - 35) | 0.68  (0.36 - 0.86) | 18.0  (12.1 - 24.0) | 33  (19 - 47) |
| LM-LBM | 0.88  (0.80 - 0.93) | 10.1  (7.0 - 13.1) | 31  (23 - 39) | 0.76  (0.54 - 0.88) | 3.7  (2.7 - 4.7) | 25  (14 - 36) | 0.73  (0.44 - 0.89) | 17.4  (11.4 - 23.4) | 31  (19 - 44) |
| MQ | 0.86  (0.76 - 0.92) | 10.4  (7.3 - 13.5) | 32  (23 - 41) | 0.77  (0.56 - 0.89) | 3.7  (2.8 - 4.6) | 25  (15 - 35) | 0.68  (0.35 - 0.86) | 17.9  (12.0 - 23.7) | 34  (18 - 50) |

**Table ESM 2:** Diagnostic accuracy of creatinine clearance and of six prediction equations to classify the patients to chronic kidney disease stage CKD 4 (GFR 15 - 29 ml/min/1.73 m2) and CKD 3 (GFR 30 - 59 ml/min/1.73 m2) as compared with classification by the reference method of EDTA. Each test was performed with all patients (n = 50) to detect true positive cases that belong to CKD 4 (n = 19) and CKD 3 (n = 12). Each entry represents respective parameter of diagnostic accuracy in %.

| test | 15 ml/min ≤ GFR < 30 ml/min (n = 19 / 50) | | | | | | 30 ml/min ≤ GFR < 60 ml/min (n = 12 / 50) | | | | | |
| --- | --- | --- | --- | --- | --- | --- | --- | --- | --- | --- | --- | --- |
| Se | Sp | PPV | NPV | DGA | AU ROC | Se | Sp | PPV | NPV | DGA | AU ROC |
| CC | 26 | 90 | 63 | 67 | 66 | 74 | 75 | 79 | 53 | 91 | 78 | 78 |
| CG | 37 | 77 | 50 | 67 | 62 | 75 | 75 | 74 | 47 | 90 | 74 | 76 |
| MDRD | 47 | 87 | 69 | 73 | 72 | 79 | 75 | 79 | 53 | 91 | 78 | 71 |
| CKD-EPI | 42 | 84 | 62 | 70 | 68 | 76 | 67 | 76 | 47 | 88 | 74 | 64 |
| LM | 53 | 84 | 67 | 74 | 72 | 80 | 92 | 84 | 65 | 97 | 86 | 84 |
| LM-LBM | 58 | 87 | 73 | 77 | 76 | 82 | 92 | 84 | 65 | 97 | 86 | 84 |
| MQ | 42 | 87 | 67 | 71 | 70 | 77 | 67 | 74 | 44 | 88 | 72 | 63 |

**Table ESM 3:** Diagnostic accuracy of creatinine clearance and of six prediction equations to classify the patient's GFR below 30 and 60 ml/min/1.73 m2 as compared with the reference method of EDTA. Each test was performed in all patients (n = 50) to detect true positive findings with GFR below 30 ml/min/1.73 m2 (n = 29) and 60 ml/min/1.73 m2 (n = 41). Each entry represents respective parameter of diagnostic accuracy in %.

| test | GFR < 30 ml/min (n= 29 / 50) | | | | | | GFR < 60 ml/min (n = 41 / 50) | | | | | |
| --- | --- | --- | --- | --- | --- | --- | --- | --- | --- | --- | --- | --- |
| Se | Sp | PPV | NPV | DGA | AU ROC | Se | Sp | PPV | NPV | DGA | AU ROC |
| CC | 72 | 95 | 95 | 71 | 82 | 97 | 95 | 100 | 100 | 82 | 96 | 99 |
| CG | 66 | 100 | 100 | 68 | 80 | 97 | 93 | 100 | 100 | 75 | 94 | 99 |
| MDRD | 79 | 100 | 100 | 78 | 88 | 96 | 93 | 78 | 95 | 70 | 90 | 98 |
| CKD-EPI | 76 | 100 | 100 | 75 | 86 | 96 | 90 | 78 | 95 | 64 | 88 | 98 |
| LM | 86 | 100 | 100 | 84 | 92 | 96 | 98 | 78 | 95 | 88 | 94 | 98 |
| LM-LBM | 86 | 100 | 100 | 84 | 92 | 96 | 98 | 78 | 95 | 88 | 94 | 98 |
| MQ | 72 | 100 | 100 | 72 | 84 | 95 | 90 | 78 | 95 | 64 | 88 | 96 |

**Table ESM 4:** Diagnostic accuracy of creatinine clearance and of six prediction equations to classify the patient's GFR below 30 and 60 ml/min/1.73 m2 as compared with the reference method of EDTA. The table presents maximum diagnostic accuracy values using optimized thresholds of positivity to recognize true GFR below 30 and 60 ml/min/1.73 m2 (27 - 37 and 60 - 86 ml/min/1.73 m2, respectively). Each entry represents respective parameter of diagnostic accuracy in %.

| test | GFR < 30 ml/min (n= 29 / 50) | | | | | | GFR < 60 ml/min (n = 41 / 50) | | | | | |
| --- | --- | --- | --- | --- | --- | --- | --- | --- | --- | --- | --- | --- |
| Se | Sp | PPV | NPV | DGA | AU ROC | Se | Sp | PPV | NPV | DGA | AU ROC |
| CC | 97 | 90 | 93 | 95 | 94 | 97 | 100 | 89 | 98 | 100 | 98 | 99 |
| CG | 83 | 100 | 100 | 81 | 90 | 97 | 100 | 78 | 95 | 100 | 96 | 99 |
| MDRD | 83 | 100 | 100 | 81 | 90 | 96 | 100 | 78 | 95 | 100 | 96 | 98 |
| CKD-EPI | 83 | 100 | 100 | 81 | 90 | 96 | 100 | 78 | 95 | 100 | 96 | 98 |
| LM | 86 | 100 | 100 | 84 | 92 | 96 | 100 | 78 | 95 | 100 | 96 | 98 |
| LM-LBM | 86 | 100 | 100 | 84 | 92 | 96 | 100 | 78 | 95 | 100 | 96 | 98 |
| MQ | 83 | 100 | 100 | 81 | 90 | 95 | 100 | 67 | 93 | 100 | 94 | 96 |
